# Supplementary material for: Antimicrobial activity and comparative metabolomic analysis of Priestia megaterium strains derived from potato and dendrobium
Source: PubMed Central journal article supplement (PMC10066289; doi:10.1038/s41598-023-32337-6), 2023-03-31
Supplement: 41598_2023_32337_MOESM1_ESM.pdf [file 41598_2023_32337_MOESM1_ESM.pdf]

# **Antimicrobial activity and comparative metabolomic analysis of *Priestia megaterium* strains derived from potato and dendrobium**

**Jia-Meng Liu<sup>†1</sup>, Yan-Tian Liang<sup>†2</sup>, Shan-Shan Wang<sup>1</sup>, Nuo Jin<sup>1</sup>, Jing Sun<sup>1</sup>, Cong Lu<sup>1</sup>, Yu-Feng Sun<sup>1</sup>, Shu-Ying Li<sup>1</sup>, Bei Fan<sup>1\*</sup>, Feng-Zhong Wang<sup>1\*</sup>**

1 Key Laboratory of Agro-products Quality and Safety Control in Storage and Transport Process, Ministry of Agriculture and Rural Affairs, Beijing, China/Institute of Food Science and Technology, Chinese Academy of Agricultural Sciences, Beijing, China

2 College of Pharmacy, Hunan University of Traditional Chinese Medicine, Hunan, China

**† These authors have contributed equally to this work and share first authorship.**

**\* Correspondence:**

Bei Fan: [caasBFan@163.com](mailto:caasBFan@163.com)

Feng-Zhong Wang: [caasFZWang@163.com](mailto:caasFZWang@163.com)

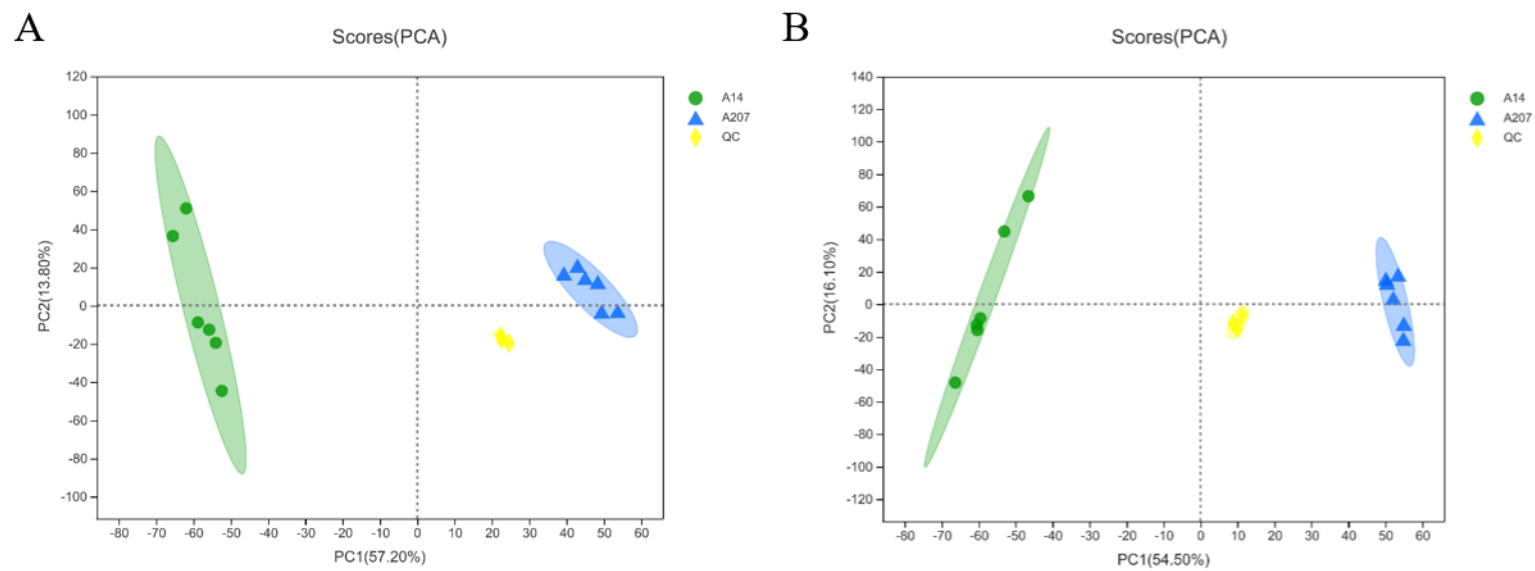

Figure S1: PCA scores plot of QC, A14 and A207 group in positive model(A) and negative model(B), indicating the QC repeatability was good and the stability of the analysis system was high.
