# Supplementary material for: Antimicrobial activity and comparative metabolomic analysis of Priestia megaterium strains derived from potato and dendrobium
Source: PubMed Central journal article supplement (PMC10066289; doi:10.1038/s41598-023-32337-6), 2023-03-31
Supplement: 41598_2023_32337_MOESM2_ESM.pdf [file 41598_2023_32337_MOESM2_ESM.pdf]

# **Antimicrobial activity and comparative metabolomic analysis of *Priestia megaterium* strains derived from potato and dendrobium**

**Jia-Meng Liu<sup>†1</sup>, Yan-Tian Liang<sup>†2</sup>, Shan-Shan Wang<sup>1</sup>, Nuo Jin<sup>1</sup>, Jing Sun<sup>1</sup>, Cong Lu<sup>1</sup>, Yu-Feng Sun<sup>1</sup>, Shu-Ying Li<sup>1</sup>, Bei Fan<sup>1\*</sup>, Feng-Zhong Wang<sup>1\*</sup>**

1 Key Laboratory of Agro-products Quality and Safety Control in Storage and Transport Process, Ministry of Agriculture and Rural Affairs, Beijing, China/Institute of Food Science and Technology, Chinese Academy of Agricultural Sciences, Beijing, China

2 College of Pharmacy, Hunan University of Traditional Chinese Medicine, Hunan, China

**† These authors have contributed equally to this work and share first authorship.**

**\* Correspondence:**

Bei Fan: [caasBFan@163.com](mailto:caasBFan@163.com)

Feng-Zhong Wang: [caasFZWang@163.com](mailto:caasFZWang@163.com)

**Table S1.** Indicator strains were used in this study.

| Strain                                 | Type strain | Disease                             |
|----------------------------------------|-------------|-------------------------------------|
| <i>P. atroseptica</i>                  | ACCC 19901  | Potato blackleg disease             |
| <i>A. rolfsii</i>                      | CBS719.83   | Dendrobium southern blight          |
| <i>S. aureus</i> drug-sensitive strain | ATCC 29213  | food-borne pathogenic microorganism |
| <i>S. aureus</i> drug-resistant strain | ATCC 33591  |                                     |
| <i>E. coli</i>                         | ATCC 25922  |                                     |

**Table S2.** Elution conditions of UPLC.

| Time(min) | Flow rate(mL/min) | A (%) | B (%) | injection volume<br>( $\mu$ L) | column temperature<br>( $^{\circ}$ C) |
|-----------|-------------------|-------|-------|--------------------------------|---------------------------------------|
| 0         | 0.4               | 95    | 5     | 20                             | 40                                    |
| 3         | 0.4               | 80    | 20    |                                |                                       |
| 9         | 0.4               | 5     | 95    |                                |                                       |
| 13.0      | 0.4               | 5     | 95    |                                |                                       |
| 13.1      | 0.4               | 95    | 5     |                                |                                       |
| 16        | 0.4               | 95    | 5     |                                |                                       |

**Table S3.** Mass spectrometric parameters.

| Options                              | Parameter      |
|--------------------------------------|----------------|
| M/Z                                  | 50-1000        |
| Ion Source Gas 1(psi)                | 50             |
| Ion Source Gas 2(psi)                | 50             |
| Curtain gas(psi)                     | 30             |
| Source temperature ( $^{\circ}$ C)   | 500            |
| IonSpray voltage floating (ESI+) (V) | 5000           |
| IonSpray voltage floating (ESI-) (V) | -4000          |
| Interface heater                     | on             |
| Declustering potential (V)           | 80             |
| Collision energy (V)                 | 5              |
| MS/MS collision energy (V)           | 20-60(rolling) |

**Table S4.** Biochemical and physiological test results of *P. megaterium* P-NA14 and *P. megaterium* D-HT207.

| Physiological and biochemical reactions | P-NA14 | D-HT207 |
|-----------------------------------------|--------|---------|
| Methyl red (M.R) test                   | +      | +       |
| Voges–Proskauer (V-P) test              | -      | -       |
| Indole test                             | -      | -       |

---

|                                   |   |   |
|-----------------------------------|---|---|
| Hydrogen sulphide production test | + | + |
| Urea test                         | - | - |
| Catalase test                     | + | + |
| Starch hydrolysis test            | + | + |
| Oxidase                           | + | + |
| Gelatin Liquefaction              | + | + |
| Nitrate reduction                 | + | + |

---
